# Supplementary material for: Glioblastoma: Pathogenesis and Current Status of Chemotherapy and Other Novel Treatments
Source: Cancers (Basel). 2020 Apr 10;12(4):937. doi: 10.3390/cancers12040937 (PMC7226351; doi:10.3390/cancers12040937)
Supplement: Supplementary file 1 [file cancers-12-00937-s001.pdf]

## Supplementary Materials

# Glioblastoma: Pathogenesis and Current Status of Chemo and Other Novel Therapies

Vilashini Rajaratnam, Mohammad Mohiminul Islam, Maixee Yang, Rachel Slaby, Hilda Martinez Ramirez, and Shama Parveen Mirza

**Table S1.** Ongoing clinical trials of targeted therapeutic agents summarized from [www.clinicaltrials.gov](http://www.clinicaltrials.gov). The details are collected from corresponding clinical trials and [www.cancer.gov](http://www.cancer.gov). The superscript numbers are unique for the therapeutic agents listed in Table S1 and are used to identify an agent in case of repeated presence in the table. They are unrelated to the superscript numbering used in Table 1.

| Therapeutic Agent (s) under Investigation                             | Description/Mechanism of Action                                                                                           | Disease Type | Clinical Trial Phase | Estimated Completion Date | Clinical Trial Identifier |
|-----------------------------------------------------------------------|---------------------------------------------------------------------------------------------------------------------------|--------------|----------------------|---------------------------|---------------------------|
| <sup>12</sup> OHOA                                                    | <sup>12</sup> hydroxy oleic acid, activates sphingomyelin synthase                                                        | Primary      | I                    | September 2023            | NCT03867123               |
| <sup>25</sup> -Flucytosine, <sup>3</sup> TG6002                       | <sup>2</sup> Fluorinated cytosine analog, inhibits thymidylate synthetase; <sup>3</sup> Oncolytic virus                   | Recurrent    | I/II                 | September 2021            | NCT03294486               |
| <sup>49</sup> -ING-41                                                 | <sup>4</sup> GSK-3 $\beta$ inhibitor                                                                                      | -            | I/II                 | November 2022             | NCT03678883               |
| <sup>5</sup> ABBV-321                                                 | <sup>5</sup> Antibody-drug conjugate, targets EGFR                                                                        | -            | I                    | August 2023               | NCT03234712               |
| <sup>6</sup> Abemaciclib                                              | <sup>6</sup> CDK inhibitor                                                                                                | Recurrent    | II                   | April 2022                | NCT02981940               |
| <sup>6</sup> Abemaciclib, <sup>7</sup> CC-115, <sup>8</sup> Neratinib | <sup>7</sup> DNA-pk and mTOR inhibitor; <sup>8</sup> Tyrosine kinase inhibitor                                            | -            | II                   | May 2021                  | NCT02977780               |
| <sup>9</sup> ABI-009                                                  | <sup>9</sup> mTOR inhibitor                                                                                               | Primary      | II                   | June 2021                 | NCT03463265               |
| <sup>10</sup> ACP-196                                                 | <sup>10</sup> Bruton's tyrosine kinase (Btk) inhibitor                                                                    | Recurrent    | Ib/II                | December 2019             | NCT02586857               |
| <sup>11</sup> Adavosertib                                             | <sup>11</sup> Trosine kinase WEE1 inhibitor                                                                               | Primary      | I                    | October 2021              | NCT01922076               |
| <sup>11</sup> Adavosertib                                             | -                                                                                                                         | Recurrent    | I                    | February 2020             | NCT01849146               |
| <sup>12</sup> Ad-hCMV-TK, <sup>13</sup> AdhCMV-Fit3L                  | <sup>12</sup> Adenoviral vector engineered to express HSV-tk; <sup>13</sup> Adenoviral vector engineered to express Flt3L | Primary      | I                    | December 2020             | NCT01811992               |
| <sup>14</sup> Ad-RTS-hIL-12                                           | <sup>14</sup> Adenoviral vector encoding hIL-12                                                                           | Recurrent    | I                    | December 2019             | NCT02026271               |

| Therapeutic Agent (s)<br>under Investigation                                                                                                                                                      | Description/Mechanism of Action                                                                                                                                                                                                                                                                                                                                                                      | Disease<br>Type | Clinical<br>Trial<br>Phase | Estimated<br>Completion<br>Date | Clinical Trial<br>Identifier |
|---------------------------------------------------------------------------------------------------------------------------------------------------------------------------------------------------|------------------------------------------------------------------------------------------------------------------------------------------------------------------------------------------------------------------------------------------------------------------------------------------------------------------------------------------------------------------------------------------------------|-----------------|----------------------------|---------------------------------|------------------------------|
| <sup>14</sup> Ad-RTS-hIL-12                                                                                                                                                                       | -                                                                                                                                                                                                                                                                                                                                                                                                    | -               | I                          | March 2021                      | NCT03330197                  |
| <sup>14</sup> Ad-RTS-hIL-12,<br><sup>15</sup> Nivolumab, <sup>16</sup> Veledimex                                                                                                                  | <sup>15</sup> Immune checkpoint inhibitor that binds to PD-1;<br><sup>16</sup> Diacylhydrazine-based activator ligand that binds to<br>RheoSwitch Therapeutic System (RTS)                                                                                                                                                                                                                           | Recurrent       | I                          | December 2021                   | NCT03636477                  |
| <sup>17</sup> ADV/HSV-tk                                                                                                                                                                          | <sup>17</sup> Gene therapy                                                                                                                                                                                                                                                                                                                                                                           | Primary         | I/II                       | December 2025                   | NCT03603405                  |
| <sup>17</sup> ADV/HSV-tk                                                                                                                                                                          | -                                                                                                                                                                                                                                                                                                                                                                                                    | Recurrent       | I                          | December 2025                   | NCT03596086                  |
| <sup>18</sup> AdV-tk, <sup>15</sup> Nivolumab,<br><sup>19</sup> Temozolomide,<br><sup>20</sup> Valacyclovir                                                                                       | <sup>18</sup> Gene therapy; <sup>19</sup> DNA Alkylating agent; <sup>20</sup> Antiviral<br>prodrug, inhibits viral DNA polymerase                                                                                                                                                                                                                                                                    | Primary         | I                          | January 2022                    | NCT03576612                  |
| <sup>21</sup> Afatinib                                                                                                                                                                            | <sup>21</sup> Tyrosine kinase inhibitor                                                                                                                                                                                                                                                                                                                                                              | Recurrent       | I                          | December 2020                   | NCT02423525                  |
| <sup>22</sup> Aldesleukin,<br><sup>23</sup> Cyclophosphamide,<br><sup>24</sup> Fludarabine                                                                                                        | <sup>22</sup> Recombinant human interleukin-2; <sup>23</sup> Synthetic DNA<br>alkylating agent; <sup>24</sup> DNA polymerase inhibitor                                                                                                                                                                                                                                                               | -               | II                         | March 2028                      | NCT03412877                  |
| <sup>22</sup> Aldesleukin,<br><sup>23</sup> Cyclophosphamide,<br><sup>24</sup> Fludarabine,<br><sup>25</sup> Pembrolizumab, <sup>26</sup> Young<br>TIL                                            | <sup>25</sup> Humanized monoclonal antibody, inhibitor of PD-1<br>receptor; <sup>26</sup> TIL: Therapeutic tumor infiltrating lymphocyte                                                                                                                                                                                                                                                             | -               | II                         | December 2024                   | NCT01174121                  |
| <sup>27</sup> ALECSAT                                                                                                                                                                             | <sup>27</sup> ALECSAT: Autologous lymphoid effector cells specific<br>against tumor                                                                                                                                                                                                                                                                                                                  | Primary         | II                         | June 2021                       | NCT02799238                  |
| <sup>28</sup> Alectinib, <sup>29</sup> APG101,<br><sup>30</sup> Atezolizumab,<br><sup>31</sup> Idasanutlin, <sup>32</sup> Palbociclib,<br><sup>33</sup> Temsirolimus,<br><sup>34</sup> Vismodegib | <sup>28</sup> Tyrosine kinase inhibitor; <sup>29</sup> inhibitor of CD95L from<br>binding to CD95 receptor; <sup>30</sup> Humanized monoclonal<br>antibody; <sup>31</sup> Antagonist of MDM2 (mouse double minute<br>2); <sup>32</sup> Cyclin-dependent kinase inhibitor; <sup>33</sup> mTOR inhibitor;<br><sup>34</sup> Antagonist of the Hedgehog-ligand cell surface receptors<br>PTCH and/or SMO | Primary         | I/II                       | September 2024                  | NCT03158389                  |

| Therapeutic Agent (s)<br>under Investigation                                                                                                                                                                                            | Description/Mechanism of Action                                                                                                                                                                                                                                                                                                                                                                                                                                                                                                                      | Disease<br>Type       | Clinical<br>Trial<br>Phase | Estimated<br>Completion<br>Date | Clinical Trial<br>Identifier |
|-----------------------------------------------------------------------------------------------------------------------------------------------------------------------------------------------------------------------------------------|------------------------------------------------------------------------------------------------------------------------------------------------------------------------------------------------------------------------------------------------------------------------------------------------------------------------------------------------------------------------------------------------------------------------------------------------------------------------------------------------------------------------------------------------------|-----------------------|----------------------------|---------------------------------|------------------------------|
| <sup>35</sup> (Allogeneic Hematopoietic Stem Cells, Cytotoxic Lymphocytes, Dendritic Vaccine)                                                                                                                                           | <sup>35</sup> Proteome based personalized immunotherapy                                                                                                                                                                                                                                                                                                                                                                                                                                                                                              | -                     | II/III                     | December 2020                   | NCT01759810                  |
| <sup>36</sup> AMG 596                                                                                                                                                                                                                   | <sup>36</sup> Anti-EGFRvIII/CD3 BiTE antibody                                                                                                                                                                                                                                                                                                                                                                                                                                                                                                        | Primary/<br>Recurrent | I                          | April 2021                      | NCT03296696                  |
| <sup>37</sup> AMG-232                                                                                                                                                                                                                   | <sup>37</sup> MDM2 inhibitor                                                                                                                                                                                                                                                                                                                                                                                                                                                                                                                         | Primary/<br>Recurrent | I                          | June 2020                       | NCT03107780                  |
| <sup>38</sup> Anti-EGFRvIII CAR T cells, <sup>23</sup> Cyclophosphamide, <sup>24</sup> Fludarabine                                                                                                                                      | <sup>38</sup> Anti-EGFRvIII CAR-transduced allogeneic T lymphocytes                                                                                                                                                                                                                                                                                                                                                                                                                                                                                  | Recurrent             | I                          | July 2019                       | NCT02844062                  |
| <sup>39</sup> Antigen-specific IgT cells                                                                                                                                                                                                | <sup>39</sup> Immunogene-modified T cells                                                                                                                                                                                                                                                                                                                                                                                                                                                                                                            | -                     | I                          | December 2020                   | NCT03170141                  |
| <sup>40</sup> Anti-PD-L1 CSR T Cells, <sup>23</sup> Cyclophosphamide, <sup>24</sup> Fludarabine                                                                                                                                         | <sup>40</sup> Autologous chimeric switch receptor modified T cells                                                                                                                                                                                                                                                                                                                                                                                                                                                                                   | Recurrent             | I                          | July 2019                       | NCT02937844                  |
| <sup>41</sup> Apatinib                                                                                                                                                                                                                  | <sup>41</sup> Tyrosine kinase inhibitor                                                                                                                                                                                                                                                                                                                                                                                                                                                                                                              | -                     | -                          | October 2019                    | NCT03567135                  |
| <sup>42</sup> Aprepitant, <sup>43</sup> Minocycline, <sup>44</sup> Disulfiram, <sup>45</sup> Celecoxib, <sup>46</sup> Sertraline, <sup>47</sup> Captopril, <sup>48</sup> Itraconazole, <sup>49</sup> Ritonavir, <sup>50</sup> Auranofin | <sup>42</sup> Substance P inhibitor; <sup>43</sup> Inhibits binding tRNA to the ribosomal complex, inhibits the enzyme 5-lipoxygenase (5LOX); <sup>44</sup> Proteasome inhibitor; <sup>45</sup> Cyclo-oxygenase (COX-2) inhibitor; <sup>46</sup> Selective serotonin reuptake inhibitor; <sup>47</sup> Angiotensin converting enzyme inhibitor; <sup>48</sup> Inhibitor of fugal cytochrome P450 enzymes; <sup>49</sup> Anti-HIV and a type of protease inhibitor; <sup>50</sup> Inhibits the activity of mitochondrial thioredoxin reductase (TrxR) | Recurrent             | I                          | March 2020                      | NCT02770378                  |
| <sup>51</sup> APX005M                                                                                                                                                                                                                   | <sup>51</sup> CD40 agonistic monoclonal antibody                                                                                                                                                                                                                                                                                                                                                                                                                                                                                                     | Recurrent             | I                          | September 2022                  | NCT03389802                  |
| Therapeutic Agent (s)<br>under Investigation                                                                                                                                                                                            | Description/Mechanism of Action                                                                                                                                                                                                                                                                                                                                                                                                                                                                                                                      | Disease<br>Type       | Clinical<br>Trial<br>Phase | Estimated<br>Completion<br>Date | Clinical Trial<br>Identifier |

|                                                       |                                                                                                       |           |       |                |                          |
|-------------------------------------------------------|-------------------------------------------------------------------------------------------------------|-----------|-------|----------------|--------------------------|
| <sup>52</sup> Arsenic trioxide                        | <sup>52</sup> Damages the promyelocytic leukemia protein/ retinoic acid receptor-alpha fusion protein | -         | I/II  | May 2021       | NCT00275067              |
| <sup>53</sup> Ascorbate                               | <sup>53</sup> Causes oxidative stress                                                                 | -         | I     | December 2021  | NCT01752491              |
| <sup>53</sup> Ascorbic Acid                           | -                                                                                                     | -         | II    | December 2023  | NCT02344355              |
| <sup>54</sup> Atezolizumab                            | <sup>54</sup> Humanized monoclonal antibody, inhibits PD-L1 from binding to PD-1                      | Primary   | I/II  | June 2020      | NCT03174197              |
| <sup>54</sup> Atezolizumab, <sup>55</sup> Ipatasertib | <sup>55</sup> Inhibitor of protein kinase B                                                           | -         | I     | November 2020  | NCT03673787              |
| <sup>54</sup> Atezolizumab, <sup>56</sup> PVSRIP0     | <sup>56</sup> Polio/Rhinovirus Recombinant                                                            | Recurrent | I/II  | July 2023      | NCT03973879              |
| <sup>57</sup> Avelumab                                | <sup>57</sup> Human IgG1 monoclonal antibody, inhibits interaction of PD-L1 with PD-1                 | -         | II    | February 2020  | NCT02968940              |
| <sup>57</sup> Avelumab                                | -                                                                                                     | Primary   | II    | September 2022 | NCT03047473              |
| <sup>57</sup> Avelumab                                | -                                                                                                     | Recurrent | I     | February 2020  | NCT03341806              |
| <sup>57</sup> Avelumab, <sup>58</sup> Epacadostat     | <sup>58</sup> Inhibitor of indoleamine 2,3-dioxygenase (IDO1)                                         | Recurrent | II    | April 2024     | NCT03532295              |
| <sup>57</sup> Avelumab, <sup>59</sup> VXM01           | <sup>59</sup> Vascular endothelial growth factor receptor 2 (VEGRF-2) vaccine                         | Recurrent | I/II  | December 2020  | NCT03750071              |
| <sup>60</sup> AV-GBM-1                                | <sup>60</sup> Autologous tumor-associated antigens (TAAs)-loaded autologous dendritic cells           | Primary   | II    | June 2023      | NCT03400917              |
| <sup>61</sup> AZD1390                                 | <sup>61</sup> ATM inhibitor                                                                           | -         | I     | April 2021     | NCT03423628              |
| <sup>62</sup> AZD2014                                 | <sup>62</sup> mTOR inhibitor                                                                          | Recurrent | I     | December 2019  | NCT02619864              |
| <sup>63</sup> BAL101553                               | <sup>63</sup> Prevents tubulin polymerization and destabilizes microtubules                           | Primary   | I     | July 2022      | NCT03250299              |
| <sup>63</sup> BAL101553                               | -                                                                                                     | Primary   | I     | July 2022      | NCT03250299              |
| <sup>63</sup> BAL101553                               | -                                                                                                     | Recurrent | I/IIa | December 2019  | NCT02895360, NCT02490800 |
| <sup>64</sup> Bavituximab                             | <sup>64</sup> IgG3 monoclonal antibody, stimulates antibody-dependent cellular cytotoxicity           | Primary   | II    | July 2023      | NCT03139916              |

| Therapeutic Agent (s) under Investigation | Description/Mechanism of Action                                  | Disease Type | Clinical Trial Phase | Estimated Completion Date | Clinical Trial Identifier |
|-------------------------------------------|------------------------------------------------------------------|--------------|----------------------|---------------------------|---------------------------|
| <sup>65</sup> Belinostat                  | <sup>65</sup> Hydroxamic acid-type histone deacetylase inhibitor | Primary      | II                   | June 2022                 | NCT02137759               |

|                                                                                                             |                                                                                                                                                                                                                    |                       |      |                |             |
|-------------------------------------------------------------------------------------------------------------|--------------------------------------------------------------------------------------------------------------------------------------------------------------------------------------------------------------------|-----------------------|------|----------------|-------------|
| <sup>66</sup> Bevacizumab                                                                                   | <sup>66</sup> Recombinant humanized monoclonal antibody, inhibits VEGF receptor binding                                                                                                                            | Primary               | II   | January 2021   | NCT01149850 |
| <sup>66</sup> Bevacizumab                                                                                   | -                                                                                                                                                                                                                  | Recurrent             | II   | September 2023 | NCT01730950 |
| <sup>66</sup> Bevacizumab                                                                                   | -                                                                                                                                                                                                                  | Primary               | II   | December 2019  | NCT01740258 |
| <sup>66</sup> Bevacizumab                                                                                   | -                                                                                                                                                                                                                  | Recurrent             | II   | December 2020  | NCT01478321 |
| <sup>66</sup> Bevacizumab                                                                                   | -                                                                                                                                                                                                                  | Recurrent             | I    | July 2020      | NCT01392209 |
| <sup>66</sup> Bevacizumab                                                                                   | -                                                                                                                                                                                                                  | Recurrent             | II   | December 2019  | NCT00337207 |
| <sup>66</sup> Bevacizumab                                                                                   | -                                                                                                                                                                                                                  | -                     | I    | June 2020      | NCT02285959 |
| <sup>66</sup> Bevacizumab                                                                                   | -                                                                                                                                                                                                                  | Recurrent             | II   | March 20202    | NCT02663271 |
| <sup>66</sup> Bevacizumab                                                                                   | -                                                                                                                                                                                                                  | Recurrent             | II   | December 2019  | NCT01894061 |
| <sup>66</sup> Bevacizumab                                                                                   | -                                                                                                                                                                                                                  | Primary               | I/II | January 2020   | NCT01811498 |
| <sup>66</sup> Bevacizumab                                                                                   | -                                                                                                                                                                                                                  | Recurrent             | I/II | October 2021   | NCT01269853 |
| <sup>66</sup> Bevacizumab,<br><sup>67</sup> Capecitabine                                                    | <sup>67</sup> Fluoropyrimidine carbamate, prodrug of 5-fluorouracil                                                                                                                                                | Recurrent             | I    | November 2019  | NCT02669173 |
| <sup>66</sup> Bevacizumab, <sup>68</sup> Keyhole Limpet Hemocyanin, Peptide Vaccine, <sup>69</sup> PolyICLC | <sup>68</sup> Immunogenic carrier protein, increases antigenic immune responses; <sup>69</sup> Synthetic complex of carboxymethylcellulose, polyinosinic-polycytidylic acid, and poly-L-lysine double-stranded RNA | Recurrent             | II   | June 2019      | NCT02754362 |
| <sup>66</sup> Bevacizumab,<br><sup>15</sup> Nivolumab                                                       | -                                                                                                                                                                                                                  | Recurrent             | II   | December 2019  | NCT03452579 |
| <sup>66</sup> Bevacizumab,<br><sup>19</sup> Temozolomide                                                    | -                                                                                                                                                                                                                  | Recurrent             | III  | July 2023      | NCT02761070 |
| <sup>70</sup> BGB-290                                                                                       | <sup>70</sup> Inhibitor of poly (ADP-ribose) polymerase (PARP)                                                                                                                                                     | Primary/<br>Recurrent | I    | July 2027      | NCT03749187 |
| <sup>70</sup> BGB-290                                                                                       | -                                                                                                                                                                                                                  | Primary/<br>Recurrent | I/II | October 2021   | NCT03150862 |
| <sup>70</sup> BGB-290                                                                                       | -                                                                                                                                                                                                                  | Primary/<br>Recurrent | I    | July 2027      | NCT03749187 |

| Therapeutic Agent (s)<br>under Investigation | Description/Mechanism of Action | Disease<br>Type | Clinical<br>Trial<br>Phase | Estimated<br>Completion<br>Date | Clinical Trial<br>Identifier |
|----------------------------------------------|---------------------------------|-----------------|----------------------------|---------------------------------|------------------------------|
|----------------------------------------------|---------------------------------|-----------------|----------------------------|---------------------------------|------------------------------|

|                                                                                                                |                                                                                                                                                                                                                                                     |           |       |                |             |
|----------------------------------------------------------------------------------------------------------------|-----------------------------------------------------------------------------------------------------------------------------------------------------------------------------------------------------------------------------------------------------|-----------|-------|----------------|-------------|
| <sup>71</sup> BGB324                                                                                           | <sup>71</sup> AXL kinase inhibitor                                                                                                                                                                                                                  | Recurrent | I     | December 2022  | NCT03965494 |
| <sup>72</sup> BKM120                                                                                           | <sup>72</sup> Pan class-1 phosphoinositide 3-kinase inhibitor                                                                                                                                                                                       | Recurrent | I/II  | February 2020  | NCT01349660 |
| <sup>73</sup> BMS 986016                                                                                       | <sup>73</sup> Monoclonal antibody, binds to lymphocyte activation gene-3 (LAG-3) receptor                                                                                                                                                           | Recurrent | I     | December 2020  | NCT02658981 |
| <sup>73</sup> BMS-986016, <sup>15</sup> Nivolumab                                                              | -                                                                                                                                                                                                                                                   | Recurrent | I     | June 2021      | NCT03493932 |
| <sup>74</sup> BMX-001                                                                                          | <sup>74</sup> Mimetic of the human mitochondrial manganese superoxide dismutase (MnSOD)                                                                                                                                                             | Primary   | II    | September 2022 | NCT02655601 |
| <sup>75</sup> Bortezomib                                                                                       | <sup>75</sup> 26S proteasome inhibitor                                                                                                                                                                                                              | Recurrent | Ib/II | August 2023    | NCT03643549 |
| <sup>76</sup> BPM31510                                                                                         | <sup>76</sup> Modulates tumor cell metabolism                                                                                                                                                                                                       | Recurrent | I     | January 2021   | NCT03020602 |
| <sup>77</sup> BRCX014                                                                                          | <sup>77</sup> Cannabidiol                                                                                                                                                                                                                           | Primary   | I     | December 2020  | NCT03687034 |
| <sup>77</sup> BRCX014                                                                                          | -                                                                                                                                                                                                                                                   | Primary   | II    | December 2020  | NCT03607643 |
| <sup>78</sup> BXQ-350                                                                                          | <sup>78</sup> Synthetic form of the human glycoprotein saposin C (SapC), activates lysosomal enzymes                                                                                                                                                | Recurrent | I     | January 2020   | NCT02859857 |
| <sup>79</sup> C134                                                                                             | <sup>79</sup> Oncolytic virus HSV-1                                                                                                                                                                                                                 | Recurrent | I     | May 2024       | NCT03657576 |
| <sup>80</sup> C225-ILs-dox                                                                                     | <sup>80</sup> Doxorubicin-loaded Anti-EGFR-immunoliposomes                                                                                                                                                                                          | Recurrent | I     | August 2021    | NCT03603379 |
| <sup>81</sup> Cabozantinib                                                                                     | <sup>81</sup> Tyrosine kinase inhibitor                                                                                                                                                                                                             | Recurrent | II    | January 2020   | NCT02885324 |
| <sup>82</sup> CAN008                                                                                           | <sup>82</sup> Antibody like CD95 receptor/Fc fusion protein                                                                                                                                                                                         | Recurrent | II    | December 2021  | NCT03746288 |
| <sup>67</sup> Capecitabine                                                                                     | -                                                                                                                                                                                                                                                   | Primary   | I/II  | June 2021      | NCT03213002 |
| <sup>83</sup> Carboplatin                                                                                      | <sup>83</sup> Second generation platinum compound, induces intra-strand and inter-strand DNA cross-links                                                                                                                                            | Recurrent | I/II  | July 2021      | NCT03672721 |
| <sup>84</sup> Carboxyamidotriazole (CTO)                                                                       | <sup>84</sup> Inhibitor of non-voltage operated Ca <sup>2+</sup> channels                                                                                                                                                                           | Primary   | I     | -              | NCT01107522 |
| <sup>85</sup> Carboxylesterase-expressing allogeneic neural stem cells, <sup>86</sup> Irinotecan hydrochloride | <sup>85</sup> Human fetal cell line adenovirally transduced to express a modified form of the enzyme carboxylesterase hCE1m6; <sup>86</sup> Prodrug, converts into active metabolite 7-ethyl-10-hydroxy-camptothecin which inhibits topoisomerase I | Recurrent | I     | March 2020     | NCT02192359 |

| Therapeutic Agent (s)<br>under Investigation | Description/Mechanism of Action | Disease<br>Type | Clinical<br>Trial<br>Phase | Estimated<br>Completion<br>Date | Clinical Trial<br>Identifier |
|----------------------------------------------|---------------------------------|-----------------|----------------------------|---------------------------------|------------------------------|
|----------------------------------------------|---------------------------------|-----------------|----------------------------|---------------------------------|------------------------------|

| <sup>87</sup> Carcinoembryonic Antigen-Expressing Measles Virus                      | <sup>87</sup> Oncolytic viral therapy                                                                                                                   | Recurrent    | I                    | November 2019             | NCT00390299               |
|--------------------------------------------------------------------------------------|---------------------------------------------------------------------------------------------------------------------------------------------------------|--------------|----------------------|---------------------------|---------------------------|
| <sup>88</sup> CART-EGFRvIII T cells, <sup>25</sup> Pembrolizumab                     | <sup>88</sup> Engineered autologous T cells with specificity for EGFRvIII                                                                               | Primary      | I                    | December 2034             | NCT03726515               |
| <sup>89</sup> CBL0137                                                                | <sup>89</sup> Curaxin-based agent that targets Facilitates Chromatin Transcription (FACT) complex                                                       | -            | I                    | November 2019             | NCT01905228               |
| <sup>90</sup> CC-115                                                                 | <sup>90</sup> mTOR and DNA-PK inhibitor                                                                                                                 | -            | I                    | November 2019             | NCT01353625               |
| <sup>91</sup> CC-122                                                                 | <sup>91</sup> Cereblon modulator                                                                                                                        | -            | I                    | August 2020               | NCT01421524               |
| <sup>92</sup> CC-486                                                                 | <sup>92</sup> Inhibits DNA methyltransferase, and thus blocks DNA methylation                                                                           | -            | I                    | December 2018             | NCT02223052               |
| <sup>93</sup> Cediranib                                                              | <sup>93</sup> Inhibitor of vascular endothelial growth factor receptor (VEGFR-1,-2,-3) tyrosine kinases                                                 | Primary      | II                   | -                         | NCT01062425               |
| <sup>93</sup> Cediranib Maleate, <sup>94</sup> Olaparib                              | <sup>94</sup> Inhibitor of poly (ADP-ribose) polymerase                                                                                                 | Recurrent    | II                   | May 2020                  | NCT02974621               |
| <sup>95</sup> Cemiplimab, <sup>96</sup> INO-5401, <sup>97</sup> INO-9012             | <sup>95</sup> Inhibits PD-1 from binding to PD-L1; <sup>96</sup> WT1/PSMA/hTERT encoding plasmid DNA; <sup>97</sup> DNA plasmid encoding interleukin-12 | Primary      | I/II                 | January 2021              | NCT03491683               |
| <sup>98</sup> Cerebraca Wafer                                                        | <sup>98</sup> Biodegradable implant comprises (Z)-n-butylidenephthalide ((Z)-BP) and carboxyphenoxypropane-sebacic acid                                 | Recurrent    | I/IIa                | December 2021             | NCT03234595               |
| <sup>99</sup> Cetuximab, <sup>100</sup> Mannitol                                     | <sup>99</sup> Anti-EGFR monoclonal antibody; <sup>100</sup> Osmotic diuretic                                                                            | Primary      | I/II                 | June 2021                 | NCT02861898               |
| <sup>99</sup> Cetuximab, <sup>100</sup> Mannitol                                     | -                                                                                                                                                       | Recurrent    | II                   | May 2022                  | NCT02800486               |
| <sup>101</sup> Chloroquine                                                           | <sup>101</sup> Chemosensitizer, inhibits autophagy                                                                                                      | Primary      | II                   | January 2024              | NCT02432417               |
| <sup>101</sup> Chloroquine                                                           | -                                                                                                                                                       | Primary      | I                    | June 2019                 | NCT02378532               |
| Therapeutic Agent (s) under Investigation                                            | Description/Mechanism of Action                                                                                                                         | Disease Type | Clinical Trial Phase | Estimated Completion Date | Clinical Trial Identifier |
| <sup>101</sup> Chloroquine, <sup>19</sup> Temozolomide, <sup>102</sup> Valproic Acid | <sup>102</sup> Anti-epileptic drug, antitumor activity is assumed to related to inhibition of nitric oxide synthesis                                    | -            | III                  | June 2023                 | NCT03243461               |

| <sup>103</sup> CMV-Specific T Cells                                                | <sup>103</sup> Autologous cells, CMV = Cytomegalovirus                                                                                                                                                                         | -                     | I/II                       | June 2020                       | NCT02661282                  |
|------------------------------------------------------------------------------------|--------------------------------------------------------------------------------------------------------------------------------------------------------------------------------------------------------------------------------|-----------------------|----------------------------|---------------------------------|------------------------------|
| Copper, <sup>44</sup> Disulfiram                                                   | -                                                                                                                                                                                                                              | Primary               | II                         | March 2021                      | NCT03363659                  |
| Copper, <sup>44</sup> Disulfiram                                                   | -                                                                                                                                                                                                                              | Primary               | I/II                       | April 2021                      | NCT02715609                  |
| Copper, <sup>44</sup> Disulfiram                                                   | -                                                                                                                                                                                                                              | Recurrent             | II/II                      | September 2023                  | NCT02678975                  |
| <sup>104</sup> Crenolanib                                                          | <sup>104</sup> Inhibitor of platelet-derived growth factor receptor (PDGFR)                                                                                                                                                    | Recurrent             | II                         | April 2020                      | NCT02626364                  |
| <sup>23</sup> Cyclophosphamide, <sup>105</sup> ERC1671, <sup>106</sup> GM-CSF      | <sup>105</sup> Cancer vaccine, induces cytotoxic T-lymphocyte (CTL) response against GBM-associated antigens; <sup>106</sup> Recombinant agent similar to endogenous human GM-CSF, modulates proliferation and differentiation | Recurrent             | II                         | March 2023                      | NCT01903330                  |
| <sup>23</sup> Cyclophosphamide, <sup>107</sup> Etoposide, <sup>108</sup> Indoximod | <sup>107</sup> Topoisomerase II inhibitor; <sup>108</sup> Immune checkpoint inhibitor                                                                                                                                          | -                     | I                          | December 2019                   | NCT02502708                  |
| <sup>23</sup> Cyclophosphamide, <sup>109</sup> rQNestin                            | <sup>109</sup> Oncolytic HSV-1                                                                                                                                                                                                 | Recurrent             | I                          | July 2022                       | NCT03152318                  |
| <sup>110</sup> Dabrafenib, <sup>111</sup> Trametinib                               | <sup>110</sup> B-raf (BRAF) protein inhibitor; <sup>111</sup> Inhibitor of mitogen-activated protein kinase (MEK MAPK/ERK kinase)                                                                                              | Primary               | II                         | June 2022                       | NCT03919071                  |
| <sup>110</sup> Dabrafenib, <sup>111</sup> Trametinib                               | -                                                                                                                                                                                                                              | Recurrent             | II                         | September 2024                  | NCT02684058                  |
| <sup>112</sup> Dasatinib                                                           | <sup>112</sup> Inhibitor of SRC-family protein-tyrosine kinases                                                                                                                                                                | Primary               | I/II                       | -                               | NCT00869401                  |
| <sup>113</sup> Dendritic Cell Vaccination                                          | <sup>113</sup> Immunotherapy (therapeutic autologous dendritic cells)                                                                                                                                                          | Primary               | II                         | December 2023                   | NCT03927222                  |
| <sup>113</sup> Dendritic Cell Vaccination                                          | -                                                                                                                                                                                                                              | -                     | I                          | November 2023                   | NCT01808820                  |
| <sup>113</sup> Dendritic Cell Vaccination                                          | -                                                                                                                                                                                                                              | Primary/<br>Recurrent | I                          | January 2021                    | NCT02010606                  |
|                                                                                    |                                                                                                                                                                                                                                |                       |                            |                                 |                              |
| Therapeutic Agent (s)<br>under Investigation                                       | Description/Mechanism of Action                                                                                                                                                                                                | Disease<br>Type       | Clinical<br>Trial<br>Phase | Estimated<br>Completion<br>Date | Clinical Trial<br>Identifier |
| <sup>113</sup> Dendritic Cell<br>Vaccination                                       | -                                                                                                                                                                                                                              | Recurrent             | I/II                       | January 2022                    | NCT03879512                  |
| <sup>113</sup> Dendritic Cell<br>Vaccination                                       | -                                                                                                                                                                                                                              | Primary               | II                         | June 2020                       | NCT02366728                  |

|                                                                                              |                                                                                                                                        |           |       |               |             |
|----------------------------------------------------------------------------------------------|----------------------------------------------------------------------------------------------------------------------------------------|-----------|-------|---------------|-------------|
| <sup>113</sup> Dendritic Cell Vaccine                                                        | -                                                                                                                                      | Primary   | I/II  | December 2022 | NCT02649582 |
| <sup>113</sup> Dendritic Cells                                                               | -                                                                                                                                      | Primary   | II    | June 2024     | NCT02465268 |
| <sup>113</sup> Dendritic Cells,<br><sup>114</sup> Lymphocytes, <sup>115</sup> Tetanus Toxoid | <sup>114</sup> Immunotherapy (therapeutic autologous lymphocytes);<br><sup>115</sup> Stimulates the production of antitoxin antibodies | Primary   | I     | January 2020  | NCT00639639 |
| <sup>113</sup> Dendritic Cells,<br><sup>15</sup> Nivolumab                                   | -                                                                                                                                      | Recurrent | II    | June 2022     | NCT03014804 |
| <sup>113</sup> Dendritic Cells,<br><sup>115</sup> Tetanus toxoid                             | -                                                                                                                                      | Primary   | I     | August 2020   | NCT03615404 |
| <sup>113</sup> Dendritic Cells                                                               | -                                                                                                                                      | -         | II/II | May 2023      | NCT03548571 |
| <sup>113</sup> Dendritic Cells                                                               | -                                                                                                                                      | Primary   | II    | June 2023     | NCT03395587 |
| <sup>44</sup> Disulfiram, Copper                                                             | -                                                                                                                                      | Primary   | II    | January 2020  | NCT01777919 |
| <sup>116</sup> DNX-2401                                                                      | <sup>116</sup> Oncolytic adenovirus serotype 5 strain                                                                                  | Recurrent | I     | February 2020 | NCT03896568 |
| <sup>116</sup> DNX-2401,<br><sup>25</sup> Pembrolizumab                                      | -                                                                                                                                      | Recurrent | II    | June 2021     | NCT02798406 |
| <sup>117</sup> DNX-2440                                                                      | <sup>117</sup> OX40L expressing oncolytic adenovirus                                                                                   | Recurrent | I     | October 2022  | NCT03714334 |
| <sup>118</sup> Doxorubicin                                                                   | <sup>118</sup> Intercalates between base pairs, inhibits topoisomerase II, and thus prevents DNA replication                           | -         | II    | July 2020     | NCT02758366 |
| <sup>118</sup> Doxorubicin, <sup>107</sup> Etoposide                                         | -                                                                                                                                      | -         | I     | October 2020  | NCT02372409 |
| <sup>119</sup> DSP-7888                                                                      | <sup>119</sup> Wilms tumor gene 1 (WT1) protein derived peptide vaccine                                                                | Recurrent | I/II  | April 2020    | NCT02750891 |
| <sup>119</sup> DSP-7888                                                                      | -                                                                                                                                      | Recurrent | II    | October 2020  | NCT03149003 |

| Therapeutic Agent (s)<br>under Investigation | Description/Mechanism of Action                                                                                          | Disease<br>Type | Clinical<br>Trial<br>Phase | Estimated<br>Completion<br>Date | Clinical Trial<br>Identifier |
|----------------------------------------------|--------------------------------------------------------------------------------------------------------------------------|-----------------|----------------------------|---------------------------------|------------------------------|
| <sup>120</sup> Durvalumab                    | <sup>120</sup> Monoclonal antibody, blocks PD-L1 from binding to PD-1                                                    | Recurrent       | I/II                       | July 2020                       | NCT02866747                  |
| <sup>121</sup> EGFR BATs                     | <sup>121</sup> EGFRBi-armed activated T cells, induces T cell mediated cytotoxicity                                      | Primary         | I                          | December 2020                   | NCT03344250                  |
| <sup>122</sup> EGFR(V)-EDV-Dox               | <sup>122</sup> Doxorubicin-loaded EGFR-targeting nanocells, inhibits topoisomerase II, and thus inhibits DNA replication | Recurrent       | I                          | June 2020                       | NCT02766699                  |

|                                                                                                                                       |                                                                                                                                                                                                                                                 |           |      |                |             |
|---------------------------------------------------------------------------------------------------------------------------------------|-------------------------------------------------------------------------------------------------------------------------------------------------------------------------------------------------------------------------------------------------|-----------|------|----------------|-------------|
| <sup>88</sup> EGFRvIII CAR T Cells                                                                                                    | -                                                                                                                                                                                                                                               | Primary   | I    | September 2019 | NCT02664363 |
| <sup>88</sup> EGFRvIII-CAR-T Cells                                                                                                    | -                                                                                                                                                                                                                                               | Recurrent | I    | December 2022  | NCT03283631 |
| <sup>123</sup> Enzastaurin                                                                                                            | <sup>123</sup> Inhibitor of protein kinase C beta                                                                                                                                                                                               | Primary   | IIb  | December 2022  | NCT03776071 |
| <sup>124</sup> Epitinib Succinate (HMPL-813)                                                                                          | <sup>124</sup> Inhibitor of epidermal growth factor receptor                                                                                                                                                                                    | -         | I    | August 2020    | NCT03231501 |
| <sup>125</sup> Erbix, <sup>66</sup> Bevacizumab                                                                                       | <sup>125</sup> Inhibitor of epidermal growth factor receptor                                                                                                                                                                                    | Recurrent | I/II | January 2025   | NCT01884740 |
| <sup>126</sup> Everolimus (RAD001)                                                                                                    | <sup>126</sup> mTOR inhibitor                                                                                                                                                                                                                   | Primary   | I/II | -              | NCT01062399 |
| <sup>126</sup> Everolimus (RAD001)                                                                                                    | -                                                                                                                                                                                                                                               | Primary   | I/II | -              | NCT00553150 |
| <sup>126</sup> Everolimus, <sup>127</sup> Ribociclib                                                                                  | <sup>127</sup> Inhibitor of cyclin-dependent kinase (CDK)                                                                                                                                                                                       | Recurrent | I    | December 2020  | NCT03834740 |
| <sup>126</sup> Everolimus, <sup>127</sup> Ribociclib                                                                                  | -                                                                                                                                                                                                                                               | Primary   | I    | January 2022   | NCT03355794 |
| <sup>126</sup> Everolimus, <sup>128</sup> Sorafenib                                                                                   | <sup>128</sup> Inhibitor of RAF kinase and VEGFR-2/PDGFR-beta signaling cascade                                                                                                                                                                 | Recurrent | I/II | July 2020      | NCT01434602 |
| <sup>129</sup> Filgrastim, <sup>130</sup> Gemcitabine, <sup>127</sup> Ribociclib, <sup>131</sup> Sonidegib, <sup>132</sup> Trametinib | <sup>129</sup> Agonist of G-CSF receptor; <sup>130</sup> Inhibitor of ribonucleotide reductase; <sup>131</sup> Inhibitor of hedgehog (Hh)-ligand cell surface receptor Smo; <sup>132</sup> Inhibitor of mitogen-activated protein kinase kinase | Recurrent | I    | March 2025     | NCT03434262 |
| <sup>133</sup> Fimepinostat                                                                                                           | <sup>133</sup> Inhibitor of phosphoinositide 3-kinase (PIK) class I and pan histone deacetylase (HDAC)                                                                                                                                          | Recurrent | I    | June 2027      | NCT03893487 |

| Therapeutic Agent (s) under Investigation                                                     | Description/Mechanism of Action                                                                                                                                                                                                 | Disease Type | Clinical Trial Phase | Estimated Completion Date | Clinical Trial Identifier |
|-----------------------------------------------------------------------------------------------|---------------------------------------------------------------------------------------------------------------------------------------------------------------------------------------------------------------------------------|--------------|----------------------|---------------------------|---------------------------|
| <sup>2</sup> Flucytosine, <sup>134</sup> Leucovorin Calcium, <sup>135</sup> Neural Stem Cells | <sup>134</sup> Active metabolite of folic acid, counteracts the toxic effect of folate antagonist-type chemotherapeutic drugs; <sup>135</sup> Genetically modified E. coli cytosine deaminase (CD)-expressing neural stem cells | Recurrent    | I                    | June 2019                 | NCT02015819               |
| <sup>136</sup> FT-2102                                                                        | <sup>136</sup> IDH-1 inhibitor                                                                                                                                                                                                  | -            | I                    | April 2022                | NCT03684811               |
| <sup>137</sup> GC1118                                                                         | <sup>137</sup> Anti-EGFR monoclonal antibody                                                                                                                                                                                    | Recurrent    | II                   | July 2020                 | NCT03618667               |
| <sup>138</sup> GDC-0084                                                                       | <sup>138</sup> Phosphatidylinositol 3-kinase (PI3K) inhibitor                                                                                                                                                                   | Primary      | II                   | December 2020             | NCT03522298               |
| <sup>138</sup> GDC-0084                                                                       | -                                                                                                                                                                                                                               | Primary      | I                    | June 2024                 | NCT03696355               |

|                                                         |                                                                                               |                       |       |               |             |
|---------------------------------------------------------|-----------------------------------------------------------------------------------------------|-----------------------|-------|---------------|-------------|
| <sup>139</sup> Glasdegib (PF-04449913)                  | <sup>139</sup> Smoothened (SMO) receptor inhibitor                                            | Primary               | Ib/II | March 2021    | NCT03466450 |
| <sup>140</sup> gp96                                     | <sup>140</sup> Autologous heat shock protein                                                  | Primary               | II    | August 2023   | NCT03650257 |
| <sup>141</sup> GS5745                                   | <sup>141</sup> Anti-MMP-9 monoclonal antibody                                                 | Recurrent             | I     | January 2022  | NCT03631836 |
| <sup>141</sup> GS5745                                   | -                                                                                             | Recurrent             | I     | January 2022  | NCT03631836 |
| <sup>142</sup> GX-I7                                    | <sup>142</sup> Recombinant human IL-7-hybrid Fc                                               | -                     | I/II  | May 2020      | NCT03619239 |
| <sup>143</sup> hrBMP4                                   | <sup>143</sup> Recombinant human bone morphogenetic protein 4, binds to BMP receptors (BMPRs) | Recurrent             | I     | August 2019   | NCT02869243 |
| <sup>144</sup> HSPPC-96                                 | <sup>144</sup> Autologous cancer vaccine derived from tumor-specific heat shock protein gp96  | Primary/<br>Recurrent | I     | May 2020      | NCT02722512 |
| <sup>144</sup> HSPPC-96,<br><sup>25</sup> Pembrolizumab | -                                                                                             | Primary               | II    | January 2024  | NCT03018288 |
| <sup>145</sup> G207                                     | <sup>145</sup> Recombinant HSV-1, inhibits UL39 and viral ribonucleotide reductase            | Recurrent             | I     | July 2023     | NCT03911388 |
| <sup>145</sup> G207                                     | -                                                                                             | Recurrent             | I     | April 2020    | NCT02457845 |
| <sup>146</sup> Hydroxyurea                              | <sup>146</sup> Selective inhibitor of ribonucleoside diphosphate reductase                    | Recurrent             | I     | June 2020     | NCT03463733 |
| <sup>147</sup> Ibrutinib                                | <sup>147</sup> BTK inhibitor                                                                  | Primary               | I     | December 2019 | NCT03535350 |
| <sup>148</sup> IDH305                                   | <sup>148</sup> IDH1 (R132) inhibitor                                                          | -                     | I     | June 2020     | NCT02381886 |

| Therapeutic Agent (s)<br>under Investigation             | Description/Mechanism of Action                                                                                                                                                               | Disease<br>Type | Clinical<br>Trial<br>Phase | Estimated<br>Completion<br>Date | Clinical Trial<br>Identifier |
|----------------------------------------------------------|-----------------------------------------------------------------------------------------------------------------------------------------------------------------------------------------------|-----------------|----------------------------|---------------------------------|------------------------------|
| <sup>149</sup> IMMU-132                                  | <sup>149</sup> Antibody-drug conjugate containing humanized monoclonal antibody, hRS7, against tumor-associated calcium signal transducer 2 and linked to the active metabolite of Irinotecan | -               | I/II                       | June 2020                       | NCT01631552                  |
| <sup>150</sup> INC280                                    | <sup>150</sup> Inhibitor of the proto-oncogene c-Met (hepatocyte growth factor receptor)                                                                                                      | Recurrent       | Ib                         | November 2020                   | NCT02386826                  |
| <sup>151</sup> INCB024360,<br><sup>152</sup> Ipilimumab, | <sup>151</sup> Inhibitor of indoleamine 2,3-dioxygenase (IDO1);<br><sup>152</sup> Recombinant human monoclonal antibody, inhibitor of                                                         | Recurrent       | I                          | February 2024                   | NCT03707457                  |

|                                                    |                                                                                                                                                                             |           |      |               |             |
|----------------------------------------------------|-----------------------------------------------------------------------------------------------------------------------------------------------------------------------------|-----------|------|---------------|-------------|
| <sup>153</sup> MK-4166, <sup>15</sup> Nivolumab    | CTLA4-mediated downregulation of T-cell activation;<br><sup>153</sup> Anti-human glucocorticoid-induced tumor necrosis factor receptor (GITR) agonistic monoclonal antibody |           |      |               |             |
| <sup>154</sup> INT230-6                            | <sup>154</sup> Formulation of cisplatin, vinblastine and a cell penetration enhancer                                                                                        | Recurrent | I    | August 2020   | NCT03058289 |
| <sup>155</sup> Lonafarnib                          | <sup>155</sup> Inhibitor of farnesyl transferase                                                                                                                            | Recurrent | I    | December 2020 | NCT00102648 |
| <sup>152</sup> Ipilimumab, <sup>15</sup> Nivolumab | -                                                                                                                                                                           | Primary   | I    | -             | NCT02311920 |
| <sup>152</sup> Ipilimumab, <sup>15</sup> Nivolumab | -                                                                                                                                                                           | Recurrent | II   | August 2021   | NCT03430791 |
| <sup>152</sup> Ipilimumab, <sup>15</sup> Nivolumab | -                                                                                                                                                                           | Recurrent | I    | November 2019 | NCT03233152 |
| <sup>152</sup> Ipilimumab, <sup>15</sup> Nivolumab | -                                                                                                                                                                           | Primary   | II   | January 2020  | NCT03367715 |
| <sup>86</sup> Irinotecan                           | -                                                                                                                                                                           | Recurrent | I/II | July 2020     | NCT03119064 |
| <sup>156</sup> KB004                               | <sup>156</sup> Anti ephrin receptor A3 (EphA3) monoclonal antibody                                                                                                          | Recurrent | I    | April 2021    | NCT03374943 |
| <sup>157</sup> Lapatinib                           | <sup>157</sup> Orally-active quinazoline, reversibly blocks phosphorylation of the epidermal growth factor receptor (EGFR), ErbB2, and the Erk-1 and-2 and AKT kinases      | Primary   | II   | December 2022 | NCT01591577 |

| Therapeutic Agent (s)<br>under Investigation              | Description/Mechanism of Action                                                                                                                           | Disease Type | Clinical Trial Phase | Estimated Completion Date | Clinical Trial Identifier |
|-----------------------------------------------------------|-----------------------------------------------------------------------------------------------------------------------------------------------------------|--------------|----------------------|---------------------------|---------------------------|
| <sup>158</sup> Lapatinib Ditosylate                       | <sup>158</sup> Ditosylate salt of lapatinib                                                                                                               | Recurrent    | I                    | December 2019             | NCT02101905               |
| <sup>159</sup> LB-100                                     | <sup>159</sup> Protein phosphatase 2A inhibitor                                                                                                           | Recurrent    | II                   | August 2021               | NCT03027388               |
| <sup>160</sup> Lenvatinib,<br><sup>25</sup> Pembrolizumab | <sup>160</sup> Inhibitor of vascular endothelial growth factor receptor 2 tyrosine kinase                                                                 | -            | II                   | April 2022                | NCT03797326               |
| <sup>161</sup> Levetiracetam                              | <sup>161</sup> Anti-epileptic drug, inhibits burst firing without affecting normal neuronal excitability                                                  | Primary      | II                   | June 2022                 | NCT02815410               |
| <sup>162</sup> Lomustine                                  | <sup>162</sup> Nitrosourea compound, alkylates and crosslinks DNA                                                                                         | Recurrent    | II                   | November 2021             | NCT03022578               |
| <sup>162</sup> Lomustine, <sup>163</sup> Sunitinib        | <sup>163</sup> Inhibits tyrosine kinase activities of vascular endothelial growth factor receptor 2, platelet-derived growth factor receptor b, and c-kit | Recurrent    | II/III               | January 2020              | NCT03025893               |
| <sup>162</sup> Lomustine, <sup>164</sup> USL311           | <sup>164</sup> Inhibitor of C-X-C chemokine receptor type 4 (CXCR4)                                                                                       | Recurrent    | I/II                 | September 2022            | NCT02765165               |
| <sup>165</sup> LOXO-195                                   | <sup>165</sup> Tyrosine receptor kinase (TRK) inhibitor                                                                                                   | -            | I/II                 | February 2022             | NCT03215511               |

|                            |                                                                                                                 |           |      |                |             |
|----------------------------|-----------------------------------------------------------------------------------------------------------------|-----------|------|----------------|-------------|
| <sup>166</sup> LY2157299   | <sup>166</sup> Inhibitor of the tyrosine kinase transforming growth factor-beta (TGF- $\beta$ ) receptor type 1 | Recurrent | II   | December 2019  | NCT01582269 |
| <sup>167</sup> M032        | <sup>167</sup> Genetically engineered HSV-1 expressing IL-12                                                    | Recurrent | I    | September 2020 | NCT02062827 |
| <sup>168</sup> Marizomib   | <sup>168</sup> Inhibitor of the 20S catalytic core subunit of the proteasome                                    | Primary   | I    | May 2020       | NCT02903069 |
| <sup>168</sup> Marizomib   | -                                                                                                               | Primary   | III  | July 2023      | NCT03345095 |
| <sup>168</sup> Marizomib   | -                                                                                                               | -         | I/II | February 2020  | NCT02330562 |
| <sup>169</sup> MBG453      | <sup>169</sup> Immunotherapy                                                                                    | Recurrent | I    | June 2023      | NCT03961971 |
| <sup>170</sup> MDNA55      | <sup>170</sup> IL4-Pseudomonas exotoxin fusion protein, binds to IL-4 receptors on tumor cell surface           | Recurrent | II   | March 2020     | NCT02858895 |
| <sup>171</sup> Mebendazole | <sup>171</sup> Anthelmintic, inhibits the formation cytoplasmic microtubules in helminths                       | Primary   | I    | September 2020 | NCT01729260 |
| <sup>171</sup> Mebendazole | -                                                                                                               | -         | I    | April 2020     | NCT01837862 |
| <sup>171</sup> Mebendazole | -                                                                                                               | Recurrent | I    | June 2021      | NCT02644291 |

| Therapeutic Agent (s) under Investigation                                     | Description/Mechanism of Action                                                                                                                                                                                                                                                                                          | Disease Type      | Clinical Trial Phase | Estimated Completion Date | Clinical Trial Identifier |
|-------------------------------------------------------------------------------|--------------------------------------------------------------------------------------------------------------------------------------------------------------------------------------------------------------------------------------------------------------------------------------------------------------------------|-------------------|----------------------|---------------------------|---------------------------|
| <sup>172</sup> MEDI4736                                                       | <sup>172</sup> Fc optimized monoclonal antibody, prevents PD-L1 from binding to PD-1                                                                                                                                                                                                                                     | Primary/Recurrent | II                   | December 2019             | NCT02336165               |
| <sup>173</sup> Memantine, <sup>174</sup> Mefloquine, <sup>175</sup> Metformin | <sup>173</sup> N-methyl-D-aspartate receptor antagonist; <sup>174</sup> Chemosensitizer, accumulates in lysosome and disrupts lysosomal function, and assumed to inhibit autophagocytosis; <sup>175</sup> Antihyperglycemic, inhibits complex I (NADPH: ubiquinon oxidoreductase) of the mitochondrial respiratory chain | -                 | I                    | September 2022            | NCT01430351               |
| <sup>175</sup> Metformin                                                      | -                                                                                                                                                                                                                                                                                                                        | Recurrent         | II                   | December 2019             | NCT03243851               |
| <sup>175</sup> Metformin                                                      | -                                                                                                                                                                                                                                                                                                                        | Primary           | II                   | December 2021             | NCT02780024               |
| <sup>175</sup> Metformin                                                      | -                                                                                                                                                                                                                                                                                                                        | Recurrent         | I                    | July 2018                 | NCT02149459               |
| <sup>176</sup> MK-3475                                                        | <sup>176</sup> Humanized monoclonal antibody, inhibits PD-1 activation by its ligands                                                                                                                                                                                                                                    | Recurrent         | I                    | August 2021               | NCT02852655               |
| <sup>177</sup> MN-166                                                         | <sup>177</sup> Inhibitor of cyclic nucleotide phosphodiesterase                                                                                                                                                                                                                                                          | Recurrent         | I/II                 | December 2020             | NCT03782415               |

|                                                    |                                                                                 |           |      |                |             |
|----------------------------------------------------|---------------------------------------------------------------------------------|-----------|------|----------------|-------------|
| <sup>178</sup> NEO100                              | <sup>178</sup> Inhibitor of farnesyl transferase and geranylgeranyl transferase | Recurrent | I/II | October 2020   | NCT02704858 |
| <sup>179</sup> Neural Stem Cell Based Virotherapy  | <sup>179</sup> Neural stem cells loaded with an oncolytic adenovirus            | Primary   | I    | April 2020     | NCT03072134 |
| <sup>15</sup> Nivolumab                            | -                                                                               | Primary   | III  | August 2023    | NCT02667587 |
| <sup>15</sup> Nivolumab                            | -                                                                               | Recurrent | II   | November 2021  | NCT03743662 |
| <sup>15</sup> Nivolumab                            | -                                                                               | Recurrent | II   | August 2022    | NCT03890952 |
| <sup>15</sup> Nivolumab                            | -                                                                               | Primary   | III  | September 2020 | NCT02617589 |
| <sup>15</sup> Nivolumab                            | -                                                                               | -         | II   | August 2025    | NCT03718767 |
| <sup>15</sup> Nivolumab, <sup>58</sup> Epacadostat | -                                                                               | -         | II   | October 2020   | NCT02327078 |
| <sup>15</sup> Nivolumab, <sup>152</sup> Ipilimumab | -                                                                               | Recurrent | III  | October 2019   | NCT02017717 |

| Therapeutic Agent (s) under Investigation | Description/Mechanism of Action                                                                                                                                    | Disease Type | Clinical Trial Phase | Estimated Completion Date | Clinical Trial Identifier |
|-------------------------------------------|--------------------------------------------------------------------------------------------------------------------------------------------------------------------|--------------|----------------------|---------------------------|---------------------------|
| <sup>180</sup> NK-92/5.28.z Cells         | <sup>180</sup> Genetically modified anti-HER2-CAR-CD28zeta-expressing allogeneic natural killer cells, binds to HER2 expressed on tumor cells                      | Recurrent    | I                    | August 2020               | NCT03383978               |
| <sup>181</sup> NU-0129                    | <sup>181</sup> Spherical nucleic acid nanoparticle, inhibitor of Bcl-2-like protein 12 (BCL2L12) gene                                                              | Recurrent    | I                    | July 2022                 | NCT03020017               |
| <sup>182</sup> NVX-108                    | <sup>182</sup> Radiosensitizer, increases tumor oxygenation                                                                                                        | Primary      | II                   | December 2023             | NCT03862430               |
| <sup>183</sup> OKN-007                    | <sup>183</sup> Assumed to inhibit sulfatase-2 (SULF2)                                                                                                              | Recurrent    | I/II                 | December 2020             | NCT03649464               |
| <sup>183</sup> OKN-007                    | -                                                                                                                                                                  | Primary      | I                    | June 2025                 | NCT03587038               |
| <sup>93</sup> Olaparib                    | -                                                                                                                                                                  | -            | II                   | July 2020                 | NCT03212274               |
| <sup>184</sup> ONC201                     | <sup>184</sup> Inhibitor of the serine/threonine protein kinase Akt (protein kinase B) and extracellular signal-regulated kinase (ERK)                             | Recurrent    | II                   | December 2020             | NCT02525692               |
| <sup>185</sup> PAC-1                      | <sup>185</sup> Procaspase activating compound-1                                                                                                                    | -            | I                    | June 2020                 | NCT03332355               |
| <sup>186</sup> Pazopanib                  | <sup>186</sup> Selective inhibitor of vascular endothelial growth factor receptors (VEGFR)-1,-2 and -3, c-kit and platelet derived growth factor receptor (PDGF-R) | Primary      | I/II                 | March 2021                | NCT02331498               |
| <sup>25</sup> Pembrolizumab               | -                                                                                                                                                                  | Primary      | I                    | November 2020             | NCT02530502               |

| <sup>25</sup> Pembrolizumab                            | -                                                                                                                                                       | Recurrent    | II                   | November 2019             | NCT02337686               |
|--------------------------------------------------------|---------------------------------------------------------------------------------------------------------------------------------------------------------|--------------|----------------------|---------------------------|---------------------------|
| <sup>25</sup> Pembrolizumab                            | -                                                                                                                                                       | Recurrent    | II                   | February 2021             | NCT03661723               |
| <sup>25</sup> Pembrolizumab                            | -                                                                                                                                                       | Primary      | II                   | February 2023             | NCT03405792               |
| <sup>25</sup> Pembrolizumab                            | -                                                                                                                                                       | Recurrent    | I/II                 | February 2020             | NCT03277638               |
| <sup>25</sup> Pembrolizumab, <sup>187</sup> TTAC-0001  | <sup>187</sup> Human monoclonal antibody, prevents vascular endothelial growth factor receptor 2 from binding to its ligand VEGF                        | Recurrent    | Ib                   | April 2020                | NCT03722342               |
| <sup>25</sup> Pembrolizumab, <sup>188</sup> Vorinostat | <sup>188</sup> Inhibitor of histone deacetylase                                                                                                         | Primary      | I                    | April 2022                | NCT03426891               |
| <sup>189</sup> Pemetrexed Disodium                     | <sup>189</sup> Inhibitor of thymidylate synthase                                                                                                        | Recurrent    | II                   | December 2020             | NCT00276783               |
| <sup>190</sup> Perifosine, <sup>33</sup> Temsirolimus  | <sup>190</sup> Alkyl-phosphocholine compound, involved in cell differentiation and inhibition of cell growth, also inhibits anti-apoptotic MAPK pathway | Recurrent    | I                    | August 2019               | NCT02238496               |
|                                                        |                                                                                                                                                         |              |                      |                           |                           |
| Therapeutic Agent (s) under Investigation              | Description/Mechanism of Action                                                                                                                         | Disease Type | Clinical Trial Phase | Estimated Completion Date | Clinical Trial Identifier |
| <sup>191</sup> Personalized cellular Vaccine           | <sup>191</sup> Personalized antigen pulsed DCs                                                                                                          | Recurrent    | I                    | September 2020            | NCT02808364               |
| <sup>192</sup> Plerixafor                              | <sup>192</sup> Inhibits the binding of stromal cell-derived factor (SDF-1alpha) to the cellular receptor CXCR4                                          | Primary      | II                   | January 2027              | NCT03746080               |
| <sup>193</sup> PLX3397                                 | <sup>193</sup> Receptor tyrosine kinase (RTK) inhibitor of KIT, CSF1R and FLT3                                                                          | Primary      | Ib/II                | October 2019              | NCT01790503               |
| <sup>69</sup> Poly-ICLC                                | -                                                                                                                                                       | Primary      | I                    | May 2021                  | NCT03223103               |
| <sup>194</sup> PT2385                                  | <sup>194</sup> Inhibitor of hypoxia inducible factor (HIF)-2alpha                                                                                       | Recurrent    | II                   | December 2019             | NCT03216499               |
| <sup>195</sup> PT2977                                  | <sup>195</sup> Inhibitor of hypoxia inducible factor (HIF)-2alpha                                                                                       | -            | I                    | June 2020                 | NCT02974738               |
| <sup>56</sup> PVSRPO                                   | -                                                                                                                                                       | Recurrent    | Ib                   | July 2021                 | NCT03043391               |
| <sup>56</sup> PVSRPO                                   | -                                                                                                                                                       | Recurrent    | II                   | May 2023                  | NCT02986178               |
| <sup>56</sup> PVSRPO                                   | -                                                                                                                                                       | Recurrent    | I                    | June 2021                 | NCT01491893               |
| <sup>196</sup> Ramipril                                | <sup>196</sup> Inhibitor of nonsulfhydryl angiotensin converting enzyme (ACE)                                                                           | -            | II                   | August 2021               | NCT03475186               |

|                                        |                                                                                                                               |           |      |                |             |
|----------------------------------------|-------------------------------------------------------------------------------------------------------------------------------|-----------|------|----------------|-------------|
| <sup>197</sup> Regorafenib             | <sup>197</sup> Inhibitor of vascular endothelial growth factor receptors (VEGFRs) 2 and , and Ret, Kit, PDGFR and Raf kinases | Recurrent | II   | October 2018   | NCT02926222 |
| <sup>198</sup> Rhenium                 | <sup>198</sup> Liposomal rhenium 186, releases radiation, which kills tumor cells                                             | Recurrent | I    | January 2020   | NCT01906385 |
| <sup>127</sup> Ribociclib (LEE011)     | -                                                                                                                             | Recurrent | I    | January 2020   | NCT02345824 |
| <sup>199</sup> Rovalpituzumab Tesirine | <sup>199</sup> Antibody (SC16)-drug (D6.5) conjugate                                                                          | -         | I/II | September 2020 | NCT02709889 |
| <sup>200</sup> RRx-001                 | <sup>200</sup> Radiosensitizer                                                                                                | Primary   | I    | January 2020   | NCT02871843 |
| <sup>201</sup> Ruxolitinib             | <sup>201</sup> Inhibitor of Janus-associated kinase (JAK)                                                                     | Primary   | I    | December 2020  | NCT03514069 |
| <sup>202</sup> Sapanisertib            | <sup>202</sup> Inhibitor of raptor-mTOR and rictor-mTOR                                                                       | Recurrent | I    | December 2019  | NCT02142803 |
| <sup>203</sup> Selinexor               | <sup>203</sup> Inhibitor of CRM1 (chromosome region maintenance 1 protein)                                                    | Recurrent | II   | December 2019  | NCT01986348 |
| <sup>203</sup> Selinexor               | -                                                                                                                             | Recurrent | I    | March 2021     | NCT02323880 |

| Therapeutic Agent (s) under Investigation                                                                | Description/Mechanism of Action                                                                                             | Disease Type | Clinical Trial Phase | Estimated Completion Date | Clinical Trial Identifier |
|----------------------------------------------------------------------------------------------------------|-----------------------------------------------------------------------------------------------------------------------------|--------------|----------------------|---------------------------|---------------------------|
| <sup>204</sup> Sildenafil Citrate,<br><sup>128</sup> Sorafenib tosylate,<br><sup>102</sup> Valproic Acid | <sup>204</sup> Selective inhibitor of cyclic guanosine monophosphate (cGMP)-specific type 5 phosphodiesterase               | Recurrent    | II                   | June 2021                 | NCT01817751               |
| <sup>205</sup> Siroquin (JP001)                                                                          | <sup>205</sup> Siroquin: Rapamycin (mTOR inhibitor) + Hydroxychloroquine sulfate                                            | Primary      | II/III               | October 2023              | NCT03008148               |
| <sup>206</sup> Solriamfetol                                                                              | <sup>206</sup> Wakefulness promoting drug, improves sleep, memory, fatigue, mood, or quality of life                        | Primary      | II                   | January 2022              | NCT03868943               |
| <sup>207</sup> Sym004                                                                                    | <sup>207</sup> Anti-EGFR monoclonal antibody mixture, inhibits EGFR dependent tumor cell proliferation and metastasis       | Recurrent    | II                   | May 2020                  | NCT02540161               |
| <sup>208</sup> T Cells (genetically modified)                                                            | <sup>208</sup> IL13Rα2-specific, hinge optimized, 41BB-costimulatory CAR/truncated CD19-expressing autologous T lymphocytes | Recurrent    | I                    | May 2020                  | NCT02208362               |
| <sup>209</sup> Temferon                                                                                  | <sup>209</sup> Immunotherapy consists of autologous CD34+ enriched hematopoietic stem and progenitor cells                  | -            | I/IIa                | December 2022             | NCT03866109               |
| <sup>19</sup> Temozolomide                                                                               | -                                                                                                                           | -            | III                  | April 2021                | NCT03633552               |

|                                                      |                                                                                                                                                                      |                       |      |               |             |
|------------------------------------------------------|----------------------------------------------------------------------------------------------------------------------------------------------------------------------|-----------------------|------|---------------|-------------|
| <sup>19</sup> Temozolomide (intensified)             | -                                                                                                                                                                    | Primary               | III  | May 2023      | NCT03663725 |
| <sup>210</sup> Tesevatib                             | <sup>210</sup> Receptor tyrosine kinase (RTK) inhibitor                                                                                                              | Recurrent             | II   | December 2019 | NCT02844439 |
| <sup>211</sup> TG02                                  | <sup>211</sup> Inhibitor of cyclin dependent kinase (CDK) subtypes 1, 2, 7 and 9, Janus associated kinase 2 (JAK2), FMS related tyrosine kinase 3 (FLT3, FLK2, STK1) | Recurrent             | I/II | August 2022   | NCT02942264 |
| <sup>211</sup> TG02                                  | -                                                                                                                                                                    | Primary/<br>Recurrent | I    | August 2020   | NCT03224104 |
| <sup>212</sup> TH-302                                | <sup>212</sup> Induces intra- and inter-strand DNA crosslinks                                                                                                        | -                     | II   | July 2019     | NCT02342379 |
| <sup>213</sup> TIL (Tumor-infiltrating T Lymphocyte) | <sup>213</sup> Transgenic cells                                                                                                                                      | -                     | I    | June 2020     | NCT03347097 |

| Therapeutic Agent (s) under Investigation              | Description/Mechanism of Action                                                                                                                                                               | Disease Type | Clinical Trial Phase | Estimated Completion Date | Clinical Trial Identifier |
|--------------------------------------------------------|-----------------------------------------------------------------------------------------------------------------------------------------------------------------------------------------------|--------------|----------------------|---------------------------|---------------------------|
| <sup>214</sup> Tinostamustine                          | <sup>214</sup> Alkylating histone-deacetylase inhibitor                                                                                                                                       | Primary      | I                    | October 2020              | NCT03452930               |
| <sup>215</sup> TN-TC11G (THC+CBD)                      | <sup>215</sup> THC = $\Delta$ 9-tetrahydrocannabinol, CBD = Cannabidiol                                                                                                                       | Primary      | Ib                   | June 2020                 | NCT03529448               |
| <sup>216</sup> Toca 511, <sup>217</sup> Toca FC        | <sup>216</sup> Replication competent retroviral vector (gene therapy);<br><sup>217</sup> An extended release oral tablet that contains flucytosine (prodrug), inhibits thymidylate synthetase | Recurrent    | II/III               | March 2023                | NCT02414165               |
| <sup>218</sup> Topotecan                               | <sup>218</sup> Selectively stabilizes topoisomerase I-DNA covalent complexes, inhibiting relegation of topoisomerase I-mediated single-strand DNA breaks                                      | -            | II                   | December 2019             | NCT01004874               |
| <sup>218</sup> Topotecan, <sup>219</sup> Pazopanib     | <sup>219</sup> Selective inhibitor of vascular endothelial growth factor receptors (VEGFR)-1, -2 and -3, c-kit and platelet derived growth factor receptor (PDGF-R)                           | Recurrent    | II                   | September 2020            | NCT01931098               |
| <sup>220</sup> Trans Sodium Crocetinate                | <sup>220</sup> Antihypoxic and radiosensitizing agent                                                                                                                                         | Primary      | III                  | June 2022                 | NCT03393000               |
| <sup>221</sup> Trebananib                              | <sup>221</sup> Angiopoietin (Ang) 1 and 2 neutralizing peptibody                                                                                                                              | Recurrent    | II                   | -                         | NCT01609790               |
| <sup>222</sup> Tremelimumab, <sup>120</sup> Durvalumab | <sup>222</sup> Human immunoglobulin (Ig) G2 monoclonal antibody, inhibits cytotoxic T-lymphocyte associated protein 4 (CTLA4) mediated downregulation of T-cell activation                    | Recurrent    | II                   | June 2020                 | NCT02794883               |

|                                                            |                                                                                                                                         |           |    |               |             |
|------------------------------------------------------------|-----------------------------------------------------------------------------------------------------------------------------------------|-----------|----|---------------|-------------|
| <sup>187</sup> TTAC-0001                                   | -                                                                                                                                       | Recurrent | II | November 2020 | NCT03856099 |
| <sup>223</sup> VAL-083                                     | <sup>223</sup> DNA alkylating and cross-linking agent                                                                                   | Recurrent | II | June 2021     | NCT02717962 |
| <sup>223</sup> VAL-083                                     | -                                                                                                                                       | Primary   | II | June 2020     | NCT03050736 |
| <sup>102</sup> Valproic Acid,<br><sup>66</sup> Bevacizumab | -                                                                                                                                       | Primary   | II | May 2019      | NCT00879437 |
| <sup>224</sup> VBI-1901                                    | <sup>224</sup> Cancer vaccine that exerts a cytotoxic T-lymphocyte (CTL) immune response against CMV gB and pp65 expressing tumor cells | Recurrent | I  | December 2019 | NCT03382977 |

| Therapeutic Agent (s)<br>under Investigation           | Description/Mechanism of Action                                                    | Disease<br>Type | Clinical<br>Trial<br>Phase | Estimated<br>Completion<br>Date | Clinical Trial<br>Identifier |
|--------------------------------------------------------|------------------------------------------------------------------------------------|-----------------|----------------------------|---------------------------------|------------------------------|
| <sup>225</sup> V-Boost                                 | <sup>225</sup> Oral tablet which contains hydrolyzed GBM antigens and alloantigens | Recurrent       | II                         | June 2020                       | NCT03916757                  |
| <sup>16</sup> Veledimex, <sup>14</sup> Ad-RTS-hIL-12   | -                                                                                  | Recurrent       | I                          | June 2021                       | NCT03679754                  |
| <sup>226</sup> Veliparib                               | <sup>226</sup> Inhibitor of poly (ADP-ribose) polymerase (PARP) -1 and -2          | Primary         | II/III                     | June 2022                       | NCT02152982                  |
| <sup>226</sup> Veliparib                               | -                                                                                  | Primary         | II                         | October 2024                    | NCT03581292                  |
| <sup>188</sup> Vorinostat                              | -                                                                                  | Primary         | I/II                       | -                               | NCT00731731                  |
| <sup>188</sup> Vorinostat                              | -                                                                                  | Primary         | I/II                       | November 2020                   | NCT01189266                  |
| <sup>188</sup> Vorinostat                              | -                                                                                  | -               | I                          | -                               | NCT00268385                  |
| <sup>188</sup> Vorinostat, <sup>227</sup> Isotretinoin | <sup>227</sup> Agonist of nuclear retinoic acid receptors (RARs)                   | Recurrent       | I/II                       | November 2019                   | NCT00555399                  |
| <sup>228</sup> WP1066                                  | <sup>228</sup> Inhibitor of Janus-associated Kinase 2 (JAK2)                       | Recurrent       | I                          | July 2021                       | NCT01904123                  |
| <sup>229</sup> ZSP1602                                 | <sup>229</sup> SMO protein inhibitor                                               | -               | I                          | December 2020                   | NCT03734913                  |
| <sup>230</sup> $\alpha$ -IFN                           | <sup>230</sup> Immunotherapeutic agent                                             | Primary         | III                        | December 2019                   | NCT01765088                  |
| <sup>231</sup> $\beta$ -elemene                        | <sup>231</sup> Induces apoptosis and cell cycle arrest                             | Primary         | III                        | May 2023                        | NCT02629757                  |

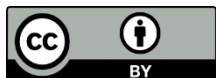

© 2019 by the authors. Submitted for possible open access publication under the terms and conditions of the Creative Commons Attribution (CC BY) license (<http://creativecommons.org/licenses/by/4.0/>).
